# Supplementary material for: Comparison of the Anesthetic Efficacy and Recovery Quality of Remimazolam Besylate versus Sevoflurane for Pediatric Circumcision: A Single-Center, Prospective, Randomized Controlled Study Protocol
Source: Research Square preprint supplement (doi:10.21203/rs.3.rs-6699382/v1), 2025-05-28
Supplement: Supplementary file 1 [file 1fba9c47bd6bea70d2e80edc.xlsx]

## Sheet: Sheet1
Table 1. Research process and evaluation schedule
Study Period/Activity	Screening / Enrollment (-t1)	Pre-anesthesia / Baseline (T0)	Anesthesia Induction (T0→T1)	Intraoperative (T1, T2, ongoing)	Anesthetic Discontinuation (T3)	Emergence / Awakening (T4)	PACU (Post-T4)	Postoperative / Discharge
PROCEDURES/ASSESSMENTS
Eligibility Screening	O
Informed Consent (Guardian)	O
Child Assent (>7 years)	O
Randomization (Stratified)	O
Record Demographics, ASA Status	O
Guardian Anxiety (STAI-S) - Pre		O
Fasting Confirmation		O
IV Line Placement		O
Standard Monitoring (ECG, NIBP, SpO2, ETCO2)		O	O	O	O	O	O
Preoxygenation (3 min)		O
Baseline Vitals & MOAA/S (T0)		O
INTERVENTIONS
Group R: Remimazolam Induction			O
Group R: Remimazolam Maintenance				O
Group S: Sevoflurane Induction			O
Group S: Sevoflurane Maintenance				O
MOAA/S (for sedation onset - T1)			O
Rescue Sedation/Anesthesia (if needed)			(O if req)	(O if req)
Penile Root Block (1% Lidocaine)				O (at MOAA/S ≤1)
Anesthetic Discontinuation (T3)					O
OUTCOME MEASURES
Time to Sedation Onset (Primary)			Collect
MAP/HR (T0, T1, T2, T3, T4)		O	O	O	O	O
Intraoperative Movement/Intervention				Record if any
MOAA/S (for recovery - T4)						O
Time to Recovery (Primary)						Collect
FLACC Score (at awakening)						O
PAED Score (5-10 min post-awake)							O
Incidence of Delirium (PAED ≥12)							O
Adverse Events (Perioperative)		Record if any	Record if any	Record if any	Record if any	Record if any	Record if any
PONV							Record if any	Record if any
PACU Stay Duration							Collect
Aldrete Score (for PACU discharge)							O
Guardian Anxiety (STAI-S) - Post								O
Guardian Satisfaction (VAS)								O
Data Entry into CRF/EDC	O	O	O	O	O	O	O	O
Figure 2. Research process and evaluation schedule. This table Outlines the schedule of all research interventions, data collection points and participant evaluations from screening to postoperative assessment. Abbreviation: ASA = American Society of Anesthesiologists; CRF = Case Report Form ECG = Electrocardiogram EDC = Electronic Data Acquisition System ETCO2 = End-expiratory carbon dioxide; FL…
